# Supplementary material for: Promoter analysis of intestinal genes induced during iron-deprivation reveals enrichment of conserved SP1-like binding sites
Source: PubMed Central journal article supplement (PMC2220005; doi:10.1186/1471-2164-8-420), 2007-11-15
Supplement: 1471-2164-8-420-S1.pdf [file 1471-2164-8-420-S1.pdf]

**Additional File 1: 228 Up-Regulated Gene Cluster From the 6 Iron-Deficient Experimental Groups**

| Probe Set ID | Symbol       | Gene Name                                                                                                   | Promoters |
|--------------|--------------|-------------------------------------------------------------------------------------------------------------|-----------|
| 1380577_at   | Abcg2        | ATP-binding cassette, sub-family G (WHITE), member 2                                                        | R, M, H   |
| 1372462_at   | Acat2        | Acetyl-Coenzyme A acetyltransferase 2                                                                       | R, M, H   |
| 1370028_at   | Ace          | Angiotensin 1 converting enzyme                                                                             | None      |
| 1387791_at   | Ace          | Angiotensin 1 converting enzyme                                                                             | None      |
| 1393048_at   | Adra2a       | Adrenergic receptor, alpha 2a                                                                               | H         |
| 1367982_at   | Alas1        | Aminolevulinic acid synthase 1                                                                              | None      |
| 1387796_at   | Alox15       | Arachidonate 12-lipoxygenase                                                                                | R, M, H   |
| 1383155_at   | Als2cr13     | Amyotrophic lateral sclerosis 2 (juvenile) chromosome region, candidate 13 (predicted)                      | M, H      |
| 1384279_at   | Als2cr13     | Amyotrophic lateral sclerosis 2 (juvenile) chromosome region, candidate 13 (predicted)                      | M, H      |
| 1375815_at   | Ank          | Progressive ankylosis homolog (mouse)                                                                       | R, M, H   |
| 1385709_x_at | Ank          | Progressive ankylosis                                                                                       | R, M, H   |
| 1373685_at   | Ankrd37      | Ankyrin repeat domain 37; Similar to Lrp2bp-pending protein                                                 | R, M, H   |
| 1386938_at   | Anpep        | Alanyl (membrane) aminopeptidase                                                                            | R, M, H   |
| 1368981_at   | Aqp4         | Aquaporin 4                                                                                                 | M, H      |
| 1372190_at   | Aqp4         | Aquaporin 4                                                                                                 | M, H      |
| 1369871_at   | Areg         | Amphiregulin                                                                                                | R, M, H   |
| 1386466_at   | Arfgap3      | ADP-ribosylation factor GTPase activating protein 3 (Arfgap3)- same chr. Region, mouse                      | M, H      |
| 1386872_at   | Arg2         | Arginase 2                                                                                                  | None      |
| 1382802_x_at | Arl2         | ADP-ribosylation factor-like 2 (Arl2); same chr. region, mouse; Endogenous retrovirus mRNA- similar         | None      |
| 1369268_at   | Atf3         | Activating transcription factor 3                                                                           | R, M, H   |
| 1369342_at   | Atp7a        | ATPase, Cu++ transporting, alpha polypeptide                                                                | R, M, H   |
| 1392536_at   | Atp7a        | ATPase, Cu++ transporting, alpha polypeptide                                                                | R, M, H   |
| 1378134_at   | Atp8b1       | ATPase, Class I, type 8B, member 1- similar                                                                 | R, M, H   |
| 1391693_at   | Atp8b1       | ATPase, Class I, type 8B, member 1 (predicted)                                                              | R, M, H   |
| 1387184_at   | Axin2        | Axin2                                                                                                       | R, M, H   |
| 1390429_at   | Axin2        | Axin2                                                                                                       | R, M, H   |
| 1371923_at   | Ayt2         | Acytransferase like 2 (predicted)                                                                           | R, M, H   |
| 1375941_at   | Baiap211     | BAI1-associated protein 2-like 1                                                                            | R, M, H   |
| 1388742_at   | Bcl2l11      | BCL2-like 11 (apoptosis facilitator)                                                                        | R, M, H   |
| 1376640_at   | C10orf38     | Similar to hypothetical protein (predicted); Astroprincin- same chr. region (human)                         | R, M, H   |
| 1376441_at   | C14orf135    | Chromosome 14 open reading frame 135; Similar to RIKEN cDNA 1810048J11 (predicted)                          | R, M, H   |
| 1384966_at   | C2orf37      | C2orf37                                                                                                     | H         |
| 1385204_at   | C2orf37      | C2orf37                                                                                                     | H         |
| 1372237_at   | C9orf24      | Chromosome 9 open reading frame 24; Testes development-related NYD-SP22 isoform 1- similar (predicted)      | H         |
| 1390801_at   | C9orf71      | Chromosome 9 open reading frame 71; Hypothetical protein MGC34760- similar                                  | R, M, H   |
| 1389636_at   | Camta1       | Calmodulin binding transcription activator 1                                                                | None      |
| 1393452_at   | Car9         | Carbonic anhydrase 9                                                                                        | None      |
| 1391481_at   | Cast         | Calpastatin                                                                                                 | None      |
| 1368037_at   | Cbr1         | Carbonyl reductase 1                                                                                        | R, M, H   |
| 1369814_at   | Ccl20        | Chemokine (C-C motif) ligand 20                                                                             | R, M, H   |
| 1384191_at   | Cdgap        | Cdc42 GTPase-activating protein                                                                             | None      |
| 1380340_at   | Cdkl2        | Cyclin-dependent kinase-like 2 (CDC2-related kinase); same chr. region, mouse                               | None      |
| 1398365_at   | Cgi-38       | Brain specific protein                                                                                      | R, M, H   |
| 1375933_at   | Cldn2        | Claudin 2                                                                                                   | R, M, H   |
| 1387856_at   | Cnn3         | Calponin 3, acidic                                                                                          | R, M, H   |
| 1391656_at   | Cpm          | Carboxypeptidase M- 83% similar to mouse                                                                    | R, M, H   |
| 1389659_at   | Ctla2b       | Cytotoxic T lymphocyte-associated protein 2 beta precursor                                                  | None      |
| 1368167_at   | Ctse         | Cathepsin E                                                                                                 | R, M, H   |
| 1376344_at   | Cybrd1       | Cytochrome b reductase 1- similar                                                                           | R, M, H   |
| 1377369_at   | Cybrd1       | Cytochrome b reductase 1 (predicted)                                                                        | R, M, H   |
| 1387020_at   | Cyp51        | Cytochrome P450, subfamily 51                                                                               | R, M, H   |
| 1368025_at   | Ddit4        | DNA-damage-inducible transcript 4                                                                           | R, M, H   |
| 1369279_at   | Dhrs9        | Dehydrogenase/reductase (SDR family) member 9                                                               | R, M, H   |
| 1378001_at   | Dhrs9        | Dehydrogenase/reductase (SDR family) member 9- similar; Retinol dehydrogenase isoform 2- homolog            | R, M, H   |
| 1373291_at   | Dlc1; Acot12 | Deleted in liver cancer 1 protein homolog; StAR-related lipid transfer protein 12; acyl-CoA thioesterase 12 | R, M, H   |
| 1390145_at   | Dmxl2        | Dmx-like 2                                                                                                  | R, M, H   |
| 1376937_at   | Doc1         | Downregulated in ovarian cancer 1- similar                                                                  | M, H      |
| 1367966_at   | Dpp3         | Dipeptidylpeptidase 3                                                                                       | R, M, H   |
| 1387414_at   | Duox2        | Dual oxidase 2                                                                                              | R, M, H   |
| 1368146_at   | Dusp1        | Dual specificity phosphatase 1                                                                              | R, M, H   |
| 1368147_at   | Dusp1        | Dual specificity phosphatase 1                                                                              | R, M, H   |
| 1374797_at   | Eaf1         | ELL associated factor 1 (predicted)                                                                         | R, M, H   |
| 1374585_at   | Echdc1       | Enoyl Coenzyme A hydratase domain containing 1                                                              | R, M, H   |
| 1388698_at   | Ecm1         | Extracellular matrix protein 1                                                                              | R, M, H   |

| Probe Set ID | Symbol   | Gene Name                                                                                        | Promoters |
|--------------|----------|--------------------------------------------------------------------------------------------------|-----------|
| 1387658_at   | Eef2k    | Eukaryotic elongation factor-2 kinase                                                            | None      |
| 1372844_at   | Efna1    | Ephrin A1                                                                                        | R, M, H   |
| 1398273_at   | Efna1    | Ephrin A1                                                                                        | R, M, H   |
| 1390763_at   | Efna3    | Ephrin A3                                                                                        | R, M, H   |
| 1368174_at   | Egln3    | EGL nine homolog 3 ( <i>C. elegans</i> ); Hypoxia-inducible factor prolyl hydroxylase 3          | R, M, H   |
| 1368321_at   | Egr1     | Early growth response 1                                                                          | R, M, H   |
| 1388424_at   | Eif3s1   | Eukaryotic translation initiation factor 3, subunit 1 alpha (predicted)                          | M, H      |
| 1388666_at   | Enc1     | Ectodermal-neural cortex 1                                                                       | R, M, H   |
| 1398333_at   | Epas1    | Endothelial PAS domain protein 1                                                                 | R, M, H   |
| 1389297_at   | Ero1l    | ERO1-like ( <i>S. cerevisiae</i> )                                                               | R, M, H   |
| 1375908_at   | Eva1     | Epithelial V-like antigen 1 (predicted)                                                          | R, M, H   |
| 1385529_at   | Fam3b    | Family with sequence similarity 3, member B (predicted)                                          | M, H      |
| 1381632_at   | Fbxl10   | F-box and leucine-rich repeat protein 10; same chr. region, mouse                                | None      |
| 1375640_at   | Fkbp9    | FK506 binding protein 9                                                                          | R, M, H   |
| 1385268_at   | Fij10996 | Similar to 4633402D15Rik protein                                                                 | H         |
| 1385269_s_at | Fij10996 | Similar to 4633402D15Rik protein                                                                 | H         |
| 1376293_at   | Fij21865 | Endo-beta-N-acetylglucosaminidase- similar                                                       | R, M, H   |
| 1382235_at   | Fij30596 | Hypothetical protein FLJ30596, similar                                                           | None      |
| 1370829_at   | Fntb     | Farnesyltransferase, CAAX box, beta                                                              | R, M, H   |
| 1375043_at   | Fos      | FBJ murine osteosarcoma viral oncogene homolog                                                   | M, H      |
| 1382729_at   | Garnl3   | GTPase activating RANGAP domain-like 3 (Garnl3)                                                  | M, H      |
| 1373386_at   | Gjb2     | Gap junction membrane channel protein beta 2                                                     | None      |
| 1372452_at   | Gpam     | Glycerol-3-phosphate acyltransferase, mitochondrial                                              | R, M, H   |
| 1382986_at   | Gpam     | Glycerol-3-phosphate acyltransferase, mitochondrial                                              | R, M, H   |
| 1376828_at   | Gprc5a   | G protein-coupled receptor, family C, group 5, member A                                          | R, M, H   |
| 1374070_at   | Gpx2     | Glutathione peroxidase 2                                                                         | R, M, H   |
| 1372524_at   | Greb1    | GREB1 protein                                                                                    | R, M, H   |
| 1376076_at   | Hig2     | Hypoxia induced gene 2- 85% to mouse                                                             | M, H      |
| 1375852_at   | Hmgcr    | 3-hydroxy-3-methylglutaryl-Coenzyme A reductase                                                  | R, M, H   |
| 1370080_at   | Hmox1    | Heme oxygenase (decycling) 1                                                                     | None      |
| 1390480_at   | Hrasls5  | Similar to H-rev107-like protein 5; HRAS-like suppressor family, member 5                        | R, M, H   |
| 1374558_at   | Icoslg   | Inducible T-cell co-stimulator ligand; Similar to B7-like protein GL50-B (predicted)             | M, H      |
| 1368878_at   | Idi1     | Isopentenyl-diphosphate delta isomerase                                                          | None      |
| 1388872_at   | Idi1     | Isopentenyl-diphosphate delta isomerase                                                          | None      |
| 1367894_at   | Insig1   | Insulin induced gene                                                                             | None      |
| 1372097_at   | Irf8     | Interferon consensus sequence binding protein 1                                                  | None      |
| 1371186_at   | Itga6    | Integrin alpha 6                                                                                 | R, M, H   |
| 1383240_at   | Itga6    | Integrin, alpha 6                                                                                | R, M, H   |
| 1393558_at   | Itga6    | Integrin, alpha 6                                                                                | R, M, H   |
| 1383880_at   | Itgav    | Integrin, alpha V (vitronectin receptor, alpha polypeptide, antigen CD51)                        | M, H      |
| 1382439_at   | Itgb6    | Integrin, beta 6                                                                                 | R, M, H   |
| 1370975_at   | Jmjd1a   | Jumonji domain containing 1A                                                                     | R, M, H   |
| 1387160_at   | Kcne3    | Potassium voltage-gated channel, Isk-related subfamily, member 3                                 | R, M, H   |
| 1370538_at   | Lama3    | Laminin, alpha 3                                                                                 | R, M, H   |
| 1391022_at   | Lamb3    | Similar to Lamb3 protein; laminin, beta 3                                                        | R, M, H   |
| 1379340_at   | Lamc2    | Similar to laminin gamma 2 chain precursor                                                       | R, M, H   |
| 1379889_at   | Lamc2    | Laminin, gamma 2 (predicted)                                                                     | R, M, H   |
| 1376746_at   | Ldhd     | Lactate dehydrogenase D (predicted)                                                              | R, M, H   |
| 1382061_at   | Ldhd     | Lactate dehydrogenase D (predicted)                                                              | R, M, H   |
| 1387164_at   | Lect1    | Leukocyte cell derived chemotaxin 1                                                              | R, M, H   |
| 1376694_at   | Lmbr1    | Lipocalin-1 interacting membrane receptor- 88% to mouse                                          | R, M, H   |
| 1391736_at   | Lmbr1    | Lipocalin-interacting membrane receptor- similar (predicted); limb region 1 homolog (mouse)-like | R, M, H   |
| 1368054_at   | Lmna     | Lamin A                                                                                          | R, M, H   |
| 1368055_a_at | Lmna     | Lamin A                                                                                          | R, M, H   |
| 1389464_at   | Lnx1     | Ligand of numb-protein X 1 (predicted); Multi-PDZ-domain-containing protein- similar             | R, M, H   |
| 1387043_at   | Lypd3    | GPI-anchored metastasis-associated protein homolog                                               | None      |
| 1370948_a_at | Marcks   | Similar to Myristoylated alanine-rich C-kinase substrate                                         | None      |
| 1392484_at   | Moap1    | Modulator of apoptosis 1; same chr. region                                                       | R, M, H   |
| 1375990_a_at | Msl2l1   | Male-specific lethal 2-like 1 ( <i>Drosophila</i> )- similar                                     | None      |
| 1371237_a_at | Mt1a     | Metallothionein                                                                                  | R, M, H   |
| 1388271_at   | Mt2      | Metallothionein-2                                                                                | M, H      |
| 1388147_at   | Muc3     | Mucin 3                                                                                          | M, H      |
| 1374001_at   | NanogPc  | Retrotransposon NANOGPC gene; same chr. region                                                   | None      |
| 1375230_at   | Nat8     | N-acetyltransferase 8 (camello like)                                                             | None      |
| 1392627_x_at | Nat8     | N-acetyltransferase 8 (camello like)                                                             | None      |

| Probe Set ID | Symbol   | Gene Name                                                                                                          | Promoters |
|--------------|----------|--------------------------------------------------------------------------------------------------------------------|-----------|
| 1374799_at   | Ncapd2   | Non-SMC condensin I complex, subunit D2                                                                            | None      |
| 1391555_at   | Ncoa3    | Nuclear receptor coactivator 3                                                                                     | M, H      |
| 1392385_at   | Ncoa3    | Nuclear receptor coactivator 3                                                                                     | M, H      |
| 1374650_at   | Nedd9    | Neural precursor cell expressed, developmentally down-regulated gene 9 (predicted)                                 | R, M, H   |
| 1396053_at   | Nedd9    | Neural precursor cell expressed, developmentally down-regulated gene 9 (predicted)                                 | R, M, H   |
| 1370408_at   | Nid67    | Putative small membrane protein NID67                                                                              | R, M, H   |
| 1384423_at   | Nt5c2    | 5'-nucleotidase, cytosolic II (predicted)                                                                          | R, M, H   |
| 1373412_at   | Nt5c3    | 5'-nucleotidase, cytosolic III (predicted)                                                                         | R, M, H   |
| 1382776_at   | Oact1    | Similar to O-acyltransferase (membrane bound) domain containing 1 (predicted)                                      | M, H      |
| 1378814_at   | Osbpl2   | Oxysterol binding protein-like 2                                                                                   | R, M, H   |
| 1370954_at   | P4ha1    | Procollagen-proline, 2-oxoglutarate 4-dioxygenase (proline 4-hydroxylase), alpha 1 polypeptide                     | M, H      |
| 1386917_at   | Pc       | Pyruvate carboxylase                                                                                               | H         |
| 1377042_at   | Pcgf5    | Strongly similar to ring finger protein (C3HC4 type) 159 [Homo sapiens]; polycomb group ring finger 5              | M, H      |
| 1367671_at   | Pcna     | Proliferating cell nuclear antigen                                                                                 | R, M, H   |
| 1368079_at   | Pdk1     | Pyruvate dehydrogenase kinase 1                                                                                    | R, M, H   |
| 1373272_at   | Pepp2    | Phosphoinositol 3-phosphate-binding protein 2                                                                      | R, M, H   |
| 1367743_at   | Pfkf     | Phosphofructokinase, liver, B-type                                                                                 | R, M, H   |
| 1387361_s_at | Pgk1     | Phosphoglycerate kinase 1                                                                                          | R, M, H   |
| 1388318_at   | Pgk1     | Phosphoglycerate kinase 1                                                                                          | R, M, H   |
| 1381576_at   | Pik3c2b  | Phosphoinositide-3-kinase, class 2, beta polypeptide (predicted)                                                   | R, M, H   |
| 1383286_at   | Plek2    | Pleckstrin 2 (predicted)                                                                                           | R, M, H   |
| 1379536_at   | Plekha5  | Similar to phosphoinositol 3-phosphate-binding protein-3; pleckstrin homology domain containing, family A member 5 | R, M, H   |
| 1370247_a_at | Pmp22    | Peripheral myelin protein 22                                                                                       | R, M, H   |
| 1370504_a_at | Pmp22    | Peripheral myelin protein 22                                                                                       | R, M, H   |
| 1381850_at   | Ppp1r12a | Protein phosphatase 1, regulatory (inhibitor) subunit 12A                                                          | R, M, H   |
| 1384262_at   | Ppp1r3b  | Protein phosphatase 1, regulatory (inhibitor) subunit 3B                                                           | R, M, H   |
| 1373006_at   | Prp2     | Proline-rich protein PRP2                                                                                          | R, M, H   |
| 1386394_at   | Prps1    | Ribose-phosphate pyrophosphokinase 1-like; phosphoribosyl pyrophosphate synthetase 1- similar                      | R, M, H   |
| 1387085_at   | Prps1    | Phosphoribosyl pyrophosphate synthetase 1                                                                          | R, M, H   |
| 1390769_at   | Prps1    | Phosphoribosyl pyrophosphate synthetase 1- similar                                                                 | R, M, H   |
| 1393241_at   | Prss32   | Protease, serine, 32 (Prss32)                                                                                      | None      |
| 1392953_at   | Ptpla    | Protein tyrosine phosphatase-like (proline instead of catalytic arginine), member a                                | None      |
| 1398768_at   | Rbbp7    | Retinoblastoma binding protein 7                                                                                   | R, M, H   |
| 1371583_at   | Rbm3     | RNA binding motif (RNP1, RRM) protein 3                                                                            | R, M, H   |
| 1373488_at   | Rbms1    | Similar to RNA binding motif, single stranded interacting protein 1 isoform c                                      | M, H      |
| 1375870_a_at | Rbms1    | RNA binding motif, single stranded interacting protein 1 (predicted)                                               | M, H      |
| 1387240_at   | Rdh7     | Retinol dehydrogenase 7                                                                                            | R, M, H   |
| 1377751_at   | Reps2    | RALBP1 associated Eps domain containing protein 2                                                                  | R, M, H   |
| 1369958_at   | Rhob     | RhoB gene                                                                                                          | R, M, H   |
| 1372197_at   | Rictor   | Pianissimo- similar; rapamycin-insensitive companion of mTOR                                                       | R, M, H   |
| 1373427_at   | Rragd    | Ras-related GTP binding D (predicted)                                                                              | R, M, H   |
| 1382835_at   | Rragd    | Unkown EST clone; Ras-related GTP binding D (Rragd)                                                                | R, M, H   |
| 1370428_x_at | RT1-Aw2  | RT1 class Ib, locus Aw2                                                                                            | None      |
| 1367668_a_at | Scd2     | Stearoyl-Coenzyme A desaturase 2                                                                                   | R, M, H   |
| 1367849_at   | Sdc1     | Syndecan 1                                                                                                         | R, M, H   |
| 1376062_at   | Sdc1     | Syndecan 1                                                                                                         | R, M, H   |
| 1376973_at   | Sdcbp2   | Syndecan binding protein (syntenin) 2                                                                              | R, M, H   |
| 1380283_at   | Sdccag33 | Serologically defined colon cancer antigen 33 (predicted)                                                          | R, M, H   |
| 1383573_at   | Sdccag33 | Serologically defined colon cancer antigen 33 (predicted)                                                          | R, M, H   |
| 1387046_at   | Slb      | Selective LIM binding factor, rat homolog                                                                          | M, H      |
| 1367877_at   | Slc11a2  | Solute carrier family 11 (proton-coupled divalent metal ion transporters), member 2                                | R, M, H   |
| 1388059_a_at | Slc11a2  | Solute carrier family 11 (proton-coupled divalent metal ion transporters), member 2                                | R, M, H   |
| 1367853_at   | Slc12a2  | Solute carrier family 12, member 2                                                                                 | R, M, H   |
| 1376969_at   | Slc23a2  | Solute carrier family 23 (nucleobase transporters), member 2                                                       | None      |
| 1380167_at   | Slc23a2  | Solute carrier family 23 (nucleobase transporters), member 2                                                       | None      |
| 1383913_at   | Slc30A10 | Zinc transporter 8; Znt8                                                                                           | R, M, H   |
| 1383971_at   | Slc30A10 | Zinc transporter 8; Znt8                                                                                           | R, M, H   |
| 1368778_at   | Slc6a6   | Solute carrier family 6 (neurotransmitter transporter, taurine), member 6                                          | R, M, H   |
| 1374531_at   | Slc6a6   | Sodium-dependent taurine transporter                                                                               | R, M, H   |
| 1380265_at   | Snappc1  | Small nuclear RNA activating complex, polypeptide 1 (predicted)                                                    | R, M, H   |
| 1376649_at   | Snf1k2   | Salt-inducible kinase 2                                                                                            | M, H      |
| 1382291_at   | Sox9     | SRY sex determining region Y-box 9 protein- similar                                                                | R, M, H   |
| 1385978_at   | Sox9     | SRY-box containing gene 9                                                                                          | R, M, H   |
| 1381534_at   | Sp6      | Trans-acting transcription factor 6; Epirofin                                                                      | R, M, H   |
| 1370884_at   | Spr      | Sepiapterin reductase                                                                                              | R, M, H   |

| Probe Set ID | Symbol      | Gene Name                                                                                                       | Promoters |
|--------------|-------------|-----------------------------------------------------------------------------------------------------------------|-----------|
| 1374864_at   | Spry2       | Sprouty-2- similar                                                                                              | None      |
| 1387017_at   | Sqle        | Squalene epoxidase                                                                                              | R, M, H   |
| 1372510_at   | Srxn1       | Sulfiredoxin 1 homolog (S. cerevisiae)                                                                          | R, M, H   |
| 1373164_at   | Stk17b      | Serine/threonine kinase 17b (apoptosis-inducing)                                                                | R, M, H   |
| 1387502_at   | Stk17b      | Serine/threonine kinase 17b (apoptosis-inducing)                                                                | R, M, H   |
| 1393956_at   | Stk17b      | Serine/threonine kinase 17b (apoptosis-inducing)                                                                | R, M, H   |
| 1384220_at   | Tbcc        | Tubulin-specific chaperone c (predicted)                                                                        | R, M, H   |
| 1377156_at   | Tcf7l2      | TCF7L2 protein- similar                                                                                         | R, M, H   |
| 1379815_at   | Tcf7l2      | Transcription factor 7-like 2, T-cell specific, HMG-box                                                         | R, M, H   |
| 1394497_at   | Tcf7l2      | Transcription factor 7-like 2 (HMG box transcription factor 4) (T-cell-specific transcription factor 4) (TCF-4) | R, M, H   |
| 1373808_at   | Tead1       | TEA domain family member 1 (SV40 transcriptional enhancer factor)- similar                                      | R, M, H   |
| 1389287_at   | Tead1       | TEA domain family member 1 (SV40 transcriptional enhancer factor)                                               | R, M, H   |
| 1389409_at   | Tes         | Transcribed locus, strongly similar to NP_035700.2 testis derived transcript [Mus musculus]                     | None      |
| 1371113_a_at | Tfrc        | Transferrin receptor                                                                                            | R, M, H   |
| 1388750_at   | Tfrc        | Transferrin receptor                                                                                            | R, M, H   |
| 1373421_at   | Tgif        | TG interacting factor (predicted)                                                                               | R, M, H   |
| 1367712_at   | Timp1       | Tissue inhibitor of metalloproteinase 1                                                                         | R, M, H   |
| 1390832_at   | Tmcc3       | Transmembrane and coiled coil domains 3- similar                                                                | R, M, H   |
| 1393822_at   | Tmcc3       | Transmembrane and coiled coil domains 3- similar                                                                | R, M, H   |
| 1377234_at   | Trim27      | Tripartite motif protein 27 (predicted)                                                                         | M, H      |
| 1371737_at   | Trim27; Rfp | Tripartite motif protein 27; Ret finger protein                                                                 | R, M, H   |
| 1376284_at   | Trim66      | Tripartite motif-containing 66- similar; Similar to transcriptional intermediary factor 1 delta                 | None      |
| 1374133_at   | Trit1       | tRNA isopentenyltransferase 1 (predicted)                                                                       | R, M, H   |
| 1385641_at   | Tube1       | Similar to tubulin, epsilon 1; epsilon-tubulin                                                                  | R, M, H   |
| 1390259_at   | Ube2d1      | Similar to ubiquitin-conjugating enzyme E2D 1, UBC4/5 homolog; ubiquitin-conjugating enzyme E2D 1               | M, H      |
| 1374684_at   | Xist        | Inactive X specific transcripts                                                                                 | None      |
| 1375535_at   | Xist        | X specific transcripts                                                                                          | None      |
| 1386785_a_at | Xist        | Inactive X specific transcripts                                                                                 | None      |
| 1386721_at   | Zfp503      | Zinc-finger protein NOLZ1                                                                                       | R, M, H   |
| 1378688_at   | Znf213      | Zinc finger protein 213 (predicted)                                                                             | None      |
| 1371394_x_at |             | Endogenous retroviral sequence, 5' and 3' LTR                                                                   | None      |
| 1376304_at   |             | Transcribed locus, strongly similar to XP_236949.2 similar to hypothetical protein BC006605 [Rattus norvegicus] | None      |
| 1379660_at   |             | Unkown EST clone                                                                                                | None      |
| 1381556_at   |             | Transcribed locus, moderately similar to XP_358375.2 cDNA sequence BC013672 [Mus musculus]                      | H         |
