# Supplementary material for: Promoter analysis of intestinal genes induced during iron-deprivation reveals enrichment of conserved SP1-like binding sites
Source: PubMed Central journal article supplement (PMC2220005; doi:10.1186/1471-2164-8-420), 2007-11-15
Supplement: 1471-2164-8-420-S2.pdf [file 1471-2164-8-420-S2.pdf]

## Additional File 2: Gene Alignments with Sp1 and Fox and Sp1 binding sites

**Blue Font**- Sp1 binding sites, **Green font**- FOX binding sites; **Orange numbers**- distances between putative sites. H- human, M- mouse, R- rat. Promoter sequences go from 0-1000, with 1000 being closest to the transcription start site.

### Abcg2

M--839-[ctccgcctc](#)-848- (31)-879-[ccccgccac](#)-888- (47)-935-[cgggcgggc](#)-944  
R--889-[ctccgcctc](#)-898- (31)-929-[ccccgccac](#)-938- (47)-985-[cgggcgggc](#)-994

### Ankrd37

H--857-[agggcgggc](#)-869  
R--877-[agggcgggc](#)-889

### Aqp4

M--468-[ccccacccc](#)-477  
R--641-[ccccacccc](#)-650

### Atf3

H---098-[aaaaaa](#)[aaaaat](#)-110- (407)-517-[ccccgcccc](#)-526- (150)-766-[gagggcgggc](#)-685-----795-[ccctcctc](#)-804  
M---195-[taaaaa](#)[ataaaa](#)c-207- (222)-429-[ccccgcccc](#)-438- (298)-736-[gagggcgggc](#)-745- (100)-845-[ccccgccc](#)c-854----867-[ccctcctc](#)t-876  
R---175-[taaaaa](#)[caaaaat](#)-187- (386)-573-[ccccaccccc](#)-582- (146)-728-[gagggcgggc](#)-737- (100)-837-[ccccgccc](#)t-846

### Atp7a

H-----844-[ggaagg](#)[agggat](#)-856- (23)-879-[ggggat](#)[gggx](#)-888- (11)-899-[agaagg](#)[aggaat](#)-911  
M--79-[ttatg](#)[ttttatt](#)-91- (796)-894-[ggaagg](#)[cggggc](#)-905- (07)-912-[gtgggct](#)[ggg](#)-921- (09)-930-[cgaggg](#)[agagct](#)-942  
R--25-[ttatg](#)[ttttatt](#)-36- (790)-826-[gagggcgggc](#)-837- (07)-845-[gtgggct](#)[ggg](#)-854- (24)-878-[cgaggg](#)[agagct](#)-891

### Axin2

H--755-[ggggcgagg](#)-764- (136)-900-[ggggcgggc](#)-909- (6)-915-[cgggcgggc](#)-924  
M--792-[ggggcgagg](#)-801- (136)-937-[ggggcgggc](#)-946- (2)-948-[cgggcgggc](#)-957

### Bcl2l11

H--727-[cggggt](#)[gggg](#)-736-----881-[ggggcgagg](#)-890---924-[ggggcgagg](#)-933  
M--701-[cgggga](#)[gggg](#)-710-706-[agggcgggat](#)-715- (71)-786-[gtggcgggc](#)-795- (84)-879-[gggggt](#)[gggg](#)-888- (35)-923-[agggcgagg](#)-932---951-[agggcgagg](#)-960  
R-----731-[agggcgggat](#)-740- (71)-811-[gtggcgggc](#)-820- (84)-904-[gggggt](#)[ggga](#)-913- (35)-948-[ggggcgagg](#)-957

### Ccl20

M--782-[ctcctcccc](#)-791- (301)--788-[cctgcctc](#)-797- (501)-792-[gcctcccc](#)a-801- (401)-797-[ccccacccc](#)-806- (801)-798-[ccccacccc](#)-807  
R--798-[ctcctcccc](#)-807- (301)--804-[cctgcctc](#)-813- (501)-808-[gcctcccc](#)a-817- (401)-813-[ccccacccc](#)-822- (801)-814-[ccaacccc](#)-823

### Cgi-38

H-----835-[agggcgggc](#)-844-868-[gagggcgggc](#)-877- (5)-882-[gtggcgggc](#)-891  
M--241-[ccaccccc](#)c-250--463-[gggggt](#)[gggg](#)-472--614-[agggcgggc](#)-623-862-[tagggcgggc](#)-871- (5)-876-[gtgggaggg](#)-885- (40)-925-[gggggt](#)[ggga](#)-934  
R--366-[ccaccccc](#)g-375--521-[gggggt](#)[ggag](#)-530-----913-[tagggcgggc](#)-922- (5)-927-[gtgggaggg](#)-936- (40)-975-[gggggt](#)[ggga](#)-984

### Cnn3

H-----750-[ggggcgggc](#)-759-----793-[xxggggcggggx](#)-902  
M--192-[tataaaaa](#)[caaac](#)-204- (801)-196-[aaaa](#)[caaac](#)[caaa](#)-208- (38)-246-[aaaa](#)[caaat](#)[aac](#)-258- (486)-744-[ggggcgggc](#)-753- (23)-776-[gggagggagggc](#)-788- (19)-807-[tagggcgggc](#)-819  
R--220-[tataaaaa](#)[caaac](#)-232- (801)-224-[aaaa](#)[caaac](#)[caaaa](#)-236- (38)-274-[aaaa](#)[caaac](#)[gaa](#)c-286- (451)-737-[ggggcgggc](#)-746- (23)-769-[gggagggagggc](#)-781- (19)-800-[tagggcgggc](#)-812

### Cybrd1

H-----860-[cggggt](#)[ggggc](#)-872- (67)-940-[atccctcccc](#)-949  
M--635-[taagga](#)[aacaa](#)[agg](#)-647- (163)-810-[aaggggt](#)[gggacc](#)-882- (60)-882-[cccctcccc](#)-891  
R--635-[taagga](#)[aacaa](#)[agg](#)-647- (155)-802-[aaggggt](#)[gggacc](#)-814- (60)-874-[cccctcccc](#)-883

### Cyp51

H--594-[ggggcggtg](#)-603- (329)-932-[tcccgcccc](#)a-941  
M--593-[ggggcggtg](#)-602- (324)-926-[ccccgcccc](#)-935  
R--574-[ggggcggtg](#)-583- (350)-933-[ccccgcccc](#)-942

### Ddit4

M--698-[ccctcccc](#)-707- (109)-816-[gggggt](#)[gtgg](#)-825- (55)-880-[ggggcgggc](#)-889  
R--698-[ccctcccc](#)-707- (109)-816-[gggggt](#)[gtgg](#)-825- (55)-880-[ggggcgggc](#)-889

Additional File 2- page 2

Efna3

H--912-[gagagcagagc](#)-921- (17) -938-[gagagcagagc](#)-950  
M--891-[gagagcagagc](#)-900- (17) -917-[gagagcagagc](#)-929  
R--630-[gagagcagagc](#)-639-----809-[gagagcagagc](#)-821

Egr1

H--239-[ccccgcctct](#)-248- (440) -688-[gagggagggg](#)-697  
M--266-[ccccgcctct](#)-275- (418) -693-[gagggagggg](#)-702- (12) -714-[tgagagcagagc](#)-723  
R--277-[ccccgcctct](#)-286- (407) -693-[gagggagggg](#)-702- (12) -714-[tgagagcagagc](#)-723

Ero11

H--565-[cagagcagagc](#)-574--575-[cagagcagagc](#)-584-----732-[gagagcagagc](#)-741  
M--697-[cagagcagagc](#)-706--702-[cagagcagagc](#)-711- (40) -752-[cccgaccccg](#)-761- (134) -895-[gagagcagagc](#)-904- (13) --918-[agagcagagc](#)-926- (03) -929-[cagagcagagc](#)-938  
R--756-[cagagcagagc](#)-765--771-[cagagcagagc](#)-780- (40) -820-[cccgaccccg](#)-829- (120) -950-[gagagcagagc](#)-959- (13) --973-[agagcagagc](#)-981- (10) -991-[cagagcagagc](#)-1000

Fntb

H-----881-[gagagcagagc](#)-893- (30) -923-[gagagcagagc](#)-935  
M--256-[aaatatttatgt](#)-267- (128) -395-[gaatattttgttga](#)-407- (455) -862-[gagagcagagc](#)-874- (32) -906-[gagagcagagc](#)-918  
R--305-[aaatatttatgt](#)-316- (128) -444-[gaatattttgttga](#)-456- (425) -881-[gagagcagagc](#)-893- (32) -925-[gagagcagagc](#)-937

Rictor

H--879-[gagagcagagc](#)-887- (12) -899-[gagagcagagc](#)-907- (9) -917-[cagagcagagc](#)-926  
M--902-[gagagcagagc](#)-910- (25) -935-[gagagcagagc](#)-943- (9) -953-[cagagcagagc](#)-962

Gjb2

M--779-[gagagcagagc](#)-788- (11) -799-[tgagagcagagc](#)-808- (82) -890-[gagagcagagc](#)-899- (52) -951-[agagcagagc](#)-960  
R--773-[gagagcagagc](#)-782- (11) -793-[tgagagcagagc](#)-802- (81) -883-[gagagcagagc](#)-892- (52) -944-[agagcagagc](#)-953

Gpx2

H--669-[tcctccctcc](#)-681- (105) -786-[agagcagagc](#)-800  
M-----787-[gagagcagagc](#)-796  
R--782-[tcctccctcc](#)-794- (102) -896-[gagagcagagc](#)-905

Hmox1

H--875-[gagagcagagc](#)-884  
R--910-[gagagcagagc](#)-919

Jmjd1a

H-486-[ccctcccc](#)-494-----804-[gagagcagagc](#)-813-815-[agagcagagc](#)-824- (29) -853-[ccccgcctc](#)-862- (91) -953-[gagagcagagc](#)-962  
M-501-[ccctcccc](#)-509-526-[ccccgcctc](#)-535-821-[gagagcagagc](#)-830-826-[agagcagagc](#)-835- (29) -864-[ccccgcctc](#)-873- (90) -963-[gagagcagagc](#)-972  
R-----006-[ccccgcctc](#)-015-705-[gagagcagagc](#)-714-----987-[gagagcagagc](#)-996

Mt1a

H-----914-[gagagcagagc](#)-940  
M--604-[tgagagcagagc](#)-613- (199) -812-[agagcagagc](#)-824- (33) -857-[actccgccc](#)-866  
R--582-[tgagagcagagc](#)-594- (215) -809-[agagcagagc](#)-821- (33) -854-[actccgccc](#)-863

Nt5c3

M--398-[ccccaccac](#)-407- (271) -678-[gtgagcagagc](#)-687- (199) -886-[tcccccccc](#)-895- (52) -947-[ccccgcctc](#)-956- (9) -965-[ctgagcagagc](#)-974  
R--313-[ccccaccac](#)-322- (271) -593-[gtgagcagagc](#)-602- (189) -791-[tcccccccc](#)-800- (53) -853-[ccccgcctc](#)-862- (9) -871-[ctgagcagagc](#)-880

Pcna

H-----832-[gccccgcct](#)-841-----869-[gagagcagagc](#)-881  
M--834-[gccccgcct](#)-843-864-[gccccgcct](#)-873- (43; 843-886) -886-[gagagcagagc](#)-895  
R--890-[gccccgcct](#)-899----- (43) -----942-[gagagcagagc](#)-951

Pgk1

H-----744-[ctccgcctc](#)-753----- (178) -----931-[agagcagagc](#)-940  
M--380-[tactttttattat](#)-392- (6) -398-[gagagcagagc](#)-407- (152) -559-[agagcagagc](#)-568- (152) -720-[ctccgcctc](#)-729- (206) -935-[agagcagagc](#)-944- (03) -947-[agagcagagc](#)-956  
R--423-[tactttttattat](#)-435- (2) -437-[agagcagagc](#)-446- (153) -599-[gagagcagagc](#)-608- (142) -750-[ctccgcctc](#)-759- (173) -932-[agagcagagc](#)-941- (14) -955-[agagcagagc](#)-964

Ph4a1

H--841-[gagagcagagc](#)-850  
M--714-[cagagcagagc](#)-723- (123) -846-[gtgagcagagc](#)-858  
R--642-[gagagcagagc](#)-654- (112) -766-[gtgagcagagc](#)-778

Additional File 2- page 3

Pmp22

H--894-[gaccagcccc](#)-903  
R--991-[gaccagcccc](#)-1000

Rhob

H--578-[cccctcccc](#)-587- (160) -747-[gaaggagggg](#)-756-855-[ccctgccccg](#)-864-861-[cccqccc](#)-867  
M--577-[cccctcccc](#)-586- (161) -747-[gaaggcgggg](#)-756-819-[cccagccccg](#)-828  
R--492-[cccctcccc](#)-501-----973-[cccqccc](#)-979

Sdc1

H--872-[gggqatggg](#)-881- (20) -912-[ggggcgggg](#)-920-----967-[gggqatggg](#)-976  
M--874-[gggqatggg](#)-883- (09) -892-[ggggcgggg](#)-900-908-[ggggcgggg](#)-917- (5) -922-[aggqatggg](#)-931- (28) -959-[gggqatggg](#)-968  
R--827-[gggqatggg](#)-836-----861-[gaaggcggg](#)-870- (5) -875-[aggqaggag](#)-884- (28) -912-[gggqatggg](#)-921

Slc11a2

H-----197-[aatTTTTTTTTTTT](#)-209- (801) -201-[TTTTTTTTTTTTTa](#)-213-----878-[Tgggcggagc](#)-892  
M--150-[ttctgtttgctt](#)-161- (09) -170-[atTTTTTTTTTTTT](#)-181- (601) -175-[TTTTTTTTTTTTTa](#)-187-232-[ttaccaataatg](#)-244-338-[ggggcgggg](#)-346-852-[Tgggcggagc](#)-866  
R--369-[ttctgtttgctt](#)-380- (18) -398-[atTTTTTTTTTTTTx](#)-408-----455-[ttaccaataatg](#)-467-637-[ggggcgggg](#)-646

Slc6a6

H-----939-[ccccqccc](#)cg-948- (2) -950-[ccccqccc](#)cc-959  
M--309-[accctcccaq](#)-318- (255) -573-[gggggagggg](#)-582- (329) -911-[gtgggcgtgg](#)-920- (14) -934-[ccctcccta](#)-943- (3) -946-[ccccqcccaq](#)-955  
R--240-[accctcccaq](#)-249- (241) -490-[gggggagggg](#)-499- (332) -831-[gtgggcgtgg](#)-840- (14) -854-[ccccqcccta](#)-863- (3) -866-[ccccqcccaq](#)-875

Spr

H-----894-[ccccqccc](#)-901  
M--826-[gtgggagtgg](#)-835-913-[ccccqccc](#)-920- (138) -973-[ctccqccccg](#)-982  
R--790-[gtgggagtgg](#)-799----- (144) -----943-[ctccqccccg](#)-952

Tbcc

H-----667-[gggggagggg](#)-676- (139) -815-[ccccacccat](#)-824- (19) -843-[tcccccccc](#)-852- (13) -865-[ccccqcccc](#)a-874- (4) -878-[ccccqcccc](#)c-887  
M--081-[tccqcccca](#)-090-625-[gggggagggg](#)-634- (152) -786-[ccccacccat](#)-795- (19) -814-[ccccaccccc](#)-823- (14) -837-[ccccqccctc](#)-846- (3) -849-[tccqccct](#)-858  
R--260-[tccqcccca](#)-269-628-[gggggagggg](#)-637- (148) -785-[ccccacccat](#)-794- (19) -813-[ccccaccccc](#)-822- (14) -836-[ccccqccctc](#)-845- (3) -848-[ccccqccct](#)-857

Tfr

H-----951-[cggggcggggcc](#)-963  
M--357-[ttttatttqctat](#)-369- (387) -756-[cgggggaggggtg](#)-768- (185) -952-[gggggtggggcc](#)-964  
R--181-[ttttatttqctat](#)-193- (381) -574-[cgggggaggggtg](#)-586- (184) -771-[cggggcggggcc](#)-783

Tgif

H-----949-[gcgggcggg](#)-958  
M--386-[gaatagacattt](#)-397- (158) -555-[ccccacccct](#)-564- (337) -901-[gggggagggg](#)-910- (18) -928-[gcgggcggg](#)-937- (17) -954-[ggggcggg](#)-963  
R--021-[gaatagacattt](#)-032- (171) -203-[ccccacccct](#)-212- (333) -545-[gggggagggg](#)-554- (16) -570-[gaaggcggg](#)-579- (17) -596-[ggggcggg](#)-605

Timpl

H-----834-[agaggagga](#)-843- (20) -863-[ccccqccct](#)-872  
M--89-[aggqatgtg](#)-100- (11) -112-[gggaaagg](#)-120- (416) -536-[cactatgtattg](#)-548- (260) -808-[gggggaaagg](#)-817-----838-[agaggagga](#)-847- (23) -870-[ccccqccct](#)-879  
R--90-[aggqatgtg](#)-101- (11) -113-[gggaaagg](#)-121- (437) -558-[cactatgtattg](#)-570- (275) -845-[gggggaaagg](#)-854-----906-[ccccqccct](#)-915

Trim27

H-----918-[agccccqccccq](#)-930  
M--650-[actgggagggg](#)c-662- (232) -894-[ttcccqccc](#)-903- (28) -931-[ggccccqccccq](#)-943  
R--453-[actgggagggg](#)c-465- (231) -696-[ttcccqccc](#)-705- (25) -730-[ggccccqccccq](#)-742
